# Supplementary material
Source: PubMed Central journal article supplement (PMC6784753)
Supplement: jamaneurol-77-184-s001.pdf [file jamaneurol-77-184-s001.pdf]

## Supplementary Online Content

Luna G, Alping P, Burman J, et al. Infection risks among patients with multiple sclerosis treated with fingolimod, natalizumab, rituximab, and injectable therapies. *JAMA Neurol*. Published online October 7, 2019. doi:10.1001/jamaneurol.2019.3365

**eTable 1.** Definitions of study outcomes and baseline medical history

**eTable 2.** Patients with RRMS and general population comparators excluded for having had the outcomes of interest in the last 6 months before treatment start

**eTable 3.** Proportion with non-missing data before imputation, by cohort

**eTable 4.** Sequential adjustment for groups of potential confounders

**eTable 5.** Observed serious infections ordered by assigned main diagnosis

**eTable 6.** All observed inpatient serious infection diagnoses during the follow-up (including secondary diagnoses and multiple diagnoses per patient)

**eTable 7.** Sensitivity analysis, 90 days lag time

**eTable 8.** Distribution of herpes antiviral use in first 18 months of DMT treatment, among those with any herpes antivirals use and at least 18 months' follow-up

This supplementary material has been provided by the authors to give readers additional information about their work.

**eTable 1: Definitions of study outcomes and baseline medical history**

| <b>Outcome</b>                   | <b>Codes</b>                                                                                                                                                                                                                                                                                                                                                                                                                                                                                                                              | <b>Data source</b>                                                                                                                                   |
|----------------------------------|-------------------------------------------------------------------------------------------------------------------------------------------------------------------------------------------------------------------------------------------------------------------------------------------------------------------------------------------------------------------------------------------------------------------------------------------------------------------------------------------------------------------------------------------|------------------------------------------------------------------------------------------------------------------------------------------------------|
| Serious infections, hospitalized | ICD10:<br>A00–B99, D73.3, E06.0, E32.1, G00–G02, G04.2, G05–G07, H00.0, H44.0, H60.0–H60.3, H66–H77, H70, I30.1, I40.0, J00–J22, J32, J34.0, J36, J38.3, J39.0, J39.1, J44.0, J85, J86, K04.4, K04.6, K04.7, K10.2, K11.3, K12.2, K14.0, K57.2, K57.4, K57.8, K61, K63.0, K65.0, K65.1, K65.2, K65.9, L00–L08, L30.3, M00–M01, M46.2–M46.5, M60.0, M65.0, M71.0, M71.1, M72.6, M86, N10, N11, N12, N13.6, N15.1, N15.9, N30.0, N30.8, N30.9, N34.0, , N34.1, N34.2, N39.0, N41.2, N43.1, N45.2, N45.3, N45.4, N48.2, N61, N70, N73, N75.1 | Main diagnosis in the inpatient component of the Patient registry<br><br>If main diagnosis was MS (G35), contributory diagnoses were also considered |
| Fatal infections                 | As above                                                                                                                                                                                                                                                                                                                                                                                                                                                                                                                                  | Causes of Death registry, underlying cause of death                                                                                                  |
| Any systemic antibacterial       | ATC: J01                                                                                                                                                                                                                                                                                                                                                                                                                                                                                                                                  | Prescribed drug registry                                                                                                                             |
| Hospitalized Herpetic infections | ICD10: B00, B02, B01                                                                                                                                                                                                                                                                                                                                                                                                                                                                                                                      | Main diagnosis in the inpatient component of the Patient registry<br><br>If main diagnosis was MS (G35), contributory diagnoses were also considered |
| Herpes antivirals                | ATC: D06BB03, D06BB53, J05AB01, S01AD03, J05AB09, J05AB11                                                                                                                                                                                                                                                                                                                                                                                                                                                                                 | Prescribed drug registry                                                                                                                             |
| PML                              | ICD10: A81.2                                                                                                                                                                                                                                                                                                                                                                                                                                                                                                                              | Main or contributory diagnosis in the inpatient component of the Patient registry                                                                    |
|                                  |                                                                                                                                                                                                                                                                                                                                                                                                                                                                                                                                           |                                                                                                                                                      |
| <b>Baseline medical history</b>  | <b>Codes</b>                                                                                                                                                                                                                                                                                                                                                                                                                                                                                                                              | <b>Data source</b>                                                                                                                                   |
| Malignancy                       | Any invasive malignancy                                                                                                                                                                                                                                                                                                                                                                                                                                                                                                                   | The Cancer Registry                                                                                                                                  |
| Antidepressants use              | ATC: N06AB03, N06AB04, N06AB05, N06AB06, N06AB08, N06AB10, N06AX03, N06AX06, N06AX11, N06AX12, N06AX16, N06AX18, N06AX22, N06AX26                                                                                                                                                                                                                                                                                                                                                                                                         | Prescribed drug registry                                                                                                                             |
| Antipsychotics use               | ATC: N05AD01, N05AE04, N05AE05, N05AF01, N05AF03, N05AF05, N05AG02, N05AH02, N05AH03, N05AH04, N05AX08, N05AX12, N05AX13                                                                                                                                                                                                                                                                                                                                                                                                                  | Prescribed drug registry                                                                                                                             |
| MACE                             | ICD10: I20.0, I21, I60, I61, I62, I63, I64                                                                                                                                                                                                                                                                                                                                                                                                                                                                                                | Main or contributory diagnosis in the Patient register (in- and outpatient care)                                                                     |
| Arrhythmia                       | ICD10: I44, I45, I47, I48, I49                                                                                                                                                                                                                                                                                                                                                                                                                                                                                                            | Main or contributory diagnosis in the Patient register (in- and outpatient care)                                                                     |
| Diabetes mellitus                | ATC: A10                                                                                                                                                                                                                                                                                                                                                                                                                                                                                                                                  | Prescribed drug registry                                                                                                                             |
| COPD                             | ICD10: J44                                                                                                                                                                                                                                                                                                                                                                                                                                                                                                                                | Main or contributory diagnosis in the Patient register (in- and outpatient care)                                                                     |

Notes: ICD10 codes without a decimal place should be read as including all subdiagnoses.

**eTable 2. Patients with RRMS and general population comparators excluded for having had the outcomes of interest in the last 6 months before treatment start.**

|                       | <b>IFN<math>\beta</math>/GA<br/>(n = 2217)</b> | <b>Fingolimod<br/>(n = 1535)</b> | <b>Natalizumab<br/>(n = 1588)</b> | <b>Rituximab<br/>(n = 3260)</b> | <b>General pop.<br/>(n = 42,645)</b> |
|-----------------------|------------------------------------------------|----------------------------------|-----------------------------------|---------------------------------|--------------------------------------|
| <b>Excluded, N(%)</b> |                                                |                                  |                                   |                                 |                                      |
| Serious infections,   | 19 (0.9)                                       | 11 (0.7)                         | 15 (0.9)                          | 36 (1.1)                        | 111 (0.3)                            |
| Any antibacterial use | 345 (15.6)                                     | 273 (17.8)                       | 253 (15.9)                        | 542 (16.6)                      | 4990 (11.7)                          |
| PML                   | 1 (0.0)                                        | 0 (0.0)                          | 0 (0.0)                           | 3 (0.1)                         | 1 (0.0)                              |
| Hospitalized herpes   | 1 (0.0)                                        | 0 (0.0)                          | 0 (0.0)                           | 4 (0.1)                         | 0 (0.0)                              |
| Herpes antiviral use  | 33 (1.5)                                       | 30 (2.0)                         | 24 (1.5)                          | 83 (2.5)                        | 529 (1.2)                            |

**eTable 3: Proportion with non-missing data before imputation, by cohort**

|                                                                           | <b>IFN<math>\beta</math>/GA<br/>(n = 2217)</b> | <b>Fingolimod<br/>(n = 1535)</b>             | <b>Natalizuma<br/>b<br/>(n = 1588)</b>       | <b>Rituximab<br/>(n = 3260)</b>              | <b>General<br/>pop.<br/>(n = 42,645)</b>         |
|---------------------------------------------------------------------------|------------------------------------------------|----------------------------------------------|----------------------------------------------|----------------------------------------------|--------------------------------------------------|
| Treatment start, year                                                     | 100%                                           | 100%                                         | 100%                                         | 100%                                         | 100%                                             |
| <b>Demographic characteristics</b>                                        |                                                |                                              |                                              |                                              |                                                  |
| Age                                                                       | 100%                                           | 100%                                         | 100%                                         | 100%                                         | 100%                                             |
| Sex                                                                       | 100%                                           | 100%                                         | 100%                                         | 100%                                         | 100%                                             |
| Country of Birth                                                          | 100%                                           | 100%<br>(1 subject<br>had missing<br>data)   | 100%                                         | 100%<br>(1 subject<br>had missing<br>data)   | 100%<br>(8 subjects<br>had missing<br>data)      |
| Educational level                                                         | 100%<br>(17 subjects<br>had missing<br>data)   | 100%<br>(11 subjects<br>had missing<br>data) | 100%<br>(27 subjects<br>had missing<br>data) | 100%<br>(39 subjects<br>had missing<br>data) | 100%<br>(907<br>subjects had<br>missing<br>data) |
| Any sick leave, last year                                                 | 96%                                            | 95%                                          | 91%                                          | 72%                                          | 85%                                              |
| Any disability pension, last year                                         | 96%                                            | 95%                                          | 91%                                          | 72%                                          | 85%                                              |
| <b>Medical history previous 5<br/>years, all except recent<br/>cancer</b> | 100%                                           | 100%                                         | 100%                                         | 100%                                         | 100%                                             |
| <b>Cancer, last 5 years</b>                                               | 96%                                            | 95%                                          | 92%                                          | 73%                                          | 86%                                              |
| <b>MS-associated<br/>characteristics</b>                                  |                                                |                                              |                                              |                                              |                                                  |
| Previous use of DMTs                                                      | 100%                                           | 100%                                         | 100%                                         | 100%                                         | -                                                |
| MS duration                                                               | 94%                                            | 94%                                          | 96%                                          | 94%                                          | -                                                |
| Any relapse last year                                                     | 100%                                           | 100%                                         | 100%                                         | 100%                                         | -                                                |
| MSIS-29 physical                                                          | 15%                                            | 84%                                          | 82%                                          | 55%                                          | -                                                |
| MSIS-29 psychological                                                     | 15%                                            | 84%                                          | 82%                                          | 55%                                          | -                                                |
| EDSS                                                                      | 52%                                            | 62%                                          | 66%                                          | 65%                                          | -                                                |
| EQ-5D                                                                     | 14%                                            | 81%                                          | 42%                                          | 47%                                          | -                                                |
| SDMT score                                                                | 13%                                            | 81%                                          | 82%                                          | 53%                                          | -                                                |

**eTable 4: Sequential adjustment for groups of potential confounders**

|                              | <b>HR1 (95% CI)</b> | <b>HR2 (95% CI)</b> | <b>HR3 (95% CI)</b> | <b>HR4 (95% CI)</b> | <b>HR5 (95% CI)</b> | <b>HR5 (95% CI)</b> | <b>HR6 (95% CI)</b> |
|------------------------------|---------------------|---------------------|---------------------|---------------------|---------------------|---------------------|---------------------|
| <b>Serious infections</b>    |                     |                     |                     |                     |                     |                     |                     |
| IFN $\beta$ /GA              | 1.0 (Ref)           |                     |                     |
| Fingolimod                   | 1.63 (1.09-2.43)    | 1.81 (1.21-2.71)    | 1.80 (1.20-2.70)    | 1.38 (0.91-2.10)    | 1.30 (0.84-2.03)    | 0.78 (0.54-1.13)    | 0.75 (0.52-1.09)    |
| Natalizumab                  | 1.29 (0.85-1.98)    | 1.53 (0.99-2.35)    | 1.56 (1.02-2.41)    | 1.35 (0.87-2.09)    | 1.12 (0.71-1.77)    | 0.67 (0.45-1.00)    | 0.65 (0.44-0.98)    |
| Rituximab                    | 2.22 (1.57-3.15)    | 2.34 (1.65-3.32)    | 2.39 (1.66-3.42)    | 1.92 (1.33-2.78)    | 1.70 (1.11-2.61)    | 1.0 (Ref)           | 1.0 (Ref)           |
| General pop.                 | 0.59 (0.43-0.82)    | 0.64 (0.47-0.89)    | 0.64 (0.46-0.88)    | 0.81 (0.58-1.12)    |                     |                     |                     |
| <b>Any antibacterial use</b> |                     |                     |                     |                     |                     |                     |                     |
| IFN $\beta$ /GA              | 1.0 (Ref)           |                     |                     |
| Fingolimod                   | 1.07 (0.95-1.20)    | 1.11 (0.99-1.25)    | 1.14 (1.01-1.28)    | 1.06 (0.94-1.20)    | 1.06 (0.93-1.20)    | 0.88 (0.77-0.99)    | 0.89 (0.78-1.01)    |
| Natalizumab                  | 1.20 (1.07-1.35)    | 1.21 (1.08-1.36)    | 1.25 (1.11-1.41)    | 1.21 (1.08-1.37)    | 1.15 (1.01-1.31)    | 0.94 (0.82-1.06)    | 0.95 (0.83-1.08)    |
| Rituximab                    | 1.20 (1.08-1.32)    | 1.21 (1.10-1.34)    | 1.28 (1.16-1.42)    | 1.23 (1.10-1.37)    | 1.23 (1.08-1.40)    | 1.0 (Ref)           | 1.0 (Ref)           |
| General pop.                 | 0.77 (0.71-0.83)    | 0.77 (0.71-0.84)    | 0.80 (0.73-0.87)    | 0.90 (0.82-0.98)    |                     |                     |                     |
| <b>Herpes antiviral use</b>  |                     |                     |                     |                     |                     |                     |                     |
| IFN $\beta$ /GA              | 1.0 (Ref)           |                     |                     |
| Fingolimod                   | 2.02 (1.53-2.69)    | 2.09 (1.57-2.77)    | 1.98 (1.49-2.63)    | 1.82 (1.35-2.46)    | 1.82 (1.34-2.46)    | 1.65 (1.25-2.18)    | 1.73 (1.31-2.29)    |
| Natalizumab                  | 2.19 (1.66-2.90)    | 2.14 (1.62-2.84)    | 2.07 (1.56-2.74)    | 1.84 (1.36-2.48)    | 1.71 (1.27-2.32)    | 1.52 (1.14-2.03)    | 1.62 (1.21-2.17)    |
| Rituximab                    | 1.40 (1.06-1.85)    | 1.40 (1.06-1.85)    | 1.22 (0.92-1.63)    | 1.07 (0.79-1.45)    | 1.07 (0.76-1.49)    | 1.0 (Ref)           | 1.0 (Ref)           |
| General pop.                 | 0.61 (0.48-0.77)    | 0.60 (0.47-0.76)    | 0.57 (0.45-0.73)    | 0.61 (0.48-0.78)    |                     |                     |                     |

HR1: Crude (unadjusted) hazard ratio.

HR2: Hazard ratio adjusted for age, and sex.

HR3: Hazard ratio adjusted for age, sex, education level, and country of birth.

HR4: Hazard ratio adjusted for age, sex, education level, country of birth, sick leave, disability pension, hospitalizations previous 5 years, history of infections, cancer, antidepressants and antipsychotics use, MACE, arrhythmia.

HR5: Hazard ratio adjusted for age, sex, educational level, country of birth, sick leave, disability pension, hospitalizations previous 5 years, history of infections, cancer, antidepressants and antipsychotics use, MACE, arrhythmia, year of treatment start, region of treating clinic, relapses last year, MS duration, EDSS, MSIS-29, EQ5D, SDMT

HR6: Hazard ratio adjusted as HR5, and also for number of previous DMTs

**eTable 5: Observed serious infections ordered by assigned main diagnosis**

|       |                                                          | IFN $\beta$ /GA<br>(n = 2217) | Fingolimod<br>(n = 1535) | Natalizumab<br>(n = 1588) | Rituximab<br>(n = 3260) |
|-------|----------------------------------------------------------|-------------------------------|--------------------------|---------------------------|-------------------------|
| ICD10 | Description                                              |                               |                          |                           |                         |
| A04   | Other bacterial intestinal infections                    | 0                             | 2                        | 1                         | 5                       |
| A08   | Viral and other specified intestinal infections          | 0                             | 0                        | 0                         | 1                       |
| A09   | Infectious gastroenteritis and colitis, unspecified      | 4                             | 2                        | 4                         | 4                       |
| A15   | Respiratory tuberculosis                                 | 0                             | 0                        | 0                         | 1                       |
| A41   | Other sepsis                                             | 2                             | 2                        | 2                         | 3                       |
| A46   | Erysipelas                                               | 1                             | 1                        | 3                         | 4                       |
| A48   | Other bacterial diseases, not elsewhere classified       | 0                             | 0                        | 0                         | 1                       |
| A49   | Bacterial infection of unspecified site                  | 0                             | 0                        | 0                         | 2                       |
| A60   | Anogenital herpesviral [herpes simplex] infections       | 0                             | 0                        | 0                         | 1                       |
| A69   | Other spirochetal infections                             | 0                             | 0                        | 0                         | 5                       |
| A78   | Q fever                                                  | 0                             | 0                        | 0                         | 1                       |
| A81   | Atypical virus infections of central nervous system      | 0                             | 1                        | 0                         | 1                       |
| A87   | Viral meningitis                                         | 0                             | 0                        | 0                         | 2                       |
| A98   | Other viral hemorrhagic fevers, not elsewhere classified | 0                             | 0                        | 0                         | 1                       |
| B00   | Herpesviral [herpes simplex] infections                  | 1                             | 0                        | 0                         | 0                       |
| B01   | Varicella [chickenpox]                                   | 0                             | 0                        | 2                         | 1                       |
| B02   | Zoster [herpes zoster]                                   | 0                             | 2                        | 0                         | 0                       |
| B17   | Other acute viral hepatitis                              | 0                             | 0                        | 1                         | 0                       |
| B34   | Viral infection of unspecified site                      | 1                             | 4                        | 3                         | 5                       |
| B35   | Dermatophytosis                                          | 0                             | 0                        | 0                         | 1                       |
| B37   | Candidiasis                                              | 0                             | 0                        | 0                         | 1                       |
| B99   | Other and unspecified infectious diseases                | 0                             | 1                        | 1                         | 1                       |
| H66   | Suppurative and unspecified otitis media                 | 0                             | 0                        | 1                         | 0                       |
| H67   | Otitis media in diseases classified elsewhere            | 0                             | 1                        | 0                         | 0                       |
| J01   | Acute sinusitis                                          | 1                             | 0                        | 0                         | 4                       |
| J03   | Acute tonsillitis                                        | 1                             | 0                        | 1                         | 3                       |
| J06   | Acute upper resp infections of multiple and unsp sites   | 1                             | 1                        | 0                         | 4                       |
| J09   | Influenza due to certain identified influenza viruses    | 0                             | 1                        | 0                         | 0                       |
| J10   | Influenza due to other identified influenza virus        | 0                             | 3                        | 1                         | 2                       |
| J11   | Influenza due to unidentified influenza virus            | 0                             | 1                        | 0                         | 1                       |
| J13   | Pneumonia due to Streptococcus pneumoniae                | 0                             | 0                        | 0                         | 3                       |
| J14   | Pneumonia due to Hemophilus influenzae                   | 0                             | 0                        | 0                         | 3                       |

|      |                                                                      |   |   |   |    |
|------|----------------------------------------------------------------------|---|---|---|----|
| J15  | Bacterial pneumonia, not elsewhere classified                        | 4 | 2 | 2 | 5  |
| J18  | Pneumonia, unspecified organism                                      | 3 | 6 | 3 | 7  |
| J20  | Acute bronchitis                                                     | 0 | 1 | 0 | 1  |
| J32  | Chronic sinusitis                                                    | 1 | 0 | 0 | 1  |
| J85  | Abscess of lung and mediastinum                                      | 0 | 1 | 0 | 0  |
| K10  | Other diseases of jaws                                               | 0 | 0 | 0 | 1  |
| K57  | Diverticular disease of intestine                                    | 0 | 2 | 0 | 1  |
| K61  | Abscess of anal and rectal regions                                   | 0 | 2 | 1 | 1  |
| K65  | Peritonitis                                                          | 1 | 0 | 0 | 2  |
| L02  | Cutaneous abscess, furuncle and carbuncle                            | 4 | 0 | 2 | 3  |
| L03  | Cellulitis and acute lymphangitis                                    | 2 | 0 | 0 | 1  |
| L04  | Acute lymphadenitis                                                  | 0 | 0 | 1 | 0  |
| L08  | Other local infections of skin and subcutaneous tissue               | 0 | 0 | 0 | 4  |
| M46  | Other inflammatory spondylopathies                                   | 0 | 0 | 0 | 1  |
| M65  | Synovitis and tenosynovitis                                          | 0 | 1 | 0 | 0  |
| M72  | Fibroblastic disorders                                               | 1 | 1 | 0 | 0  |
| N10  | Acute tubulo-interstitial nephritis                                  | 5 | 3 | 6 | 12 |
| N30  | Cystitis                                                             | 0 | 2 | 1 | 1  |
| N39  | Other disorders of urinary system                                    | 7 | 8 | 1 | 8  |
| N70  | Salpingitis and oophoritis                                           | 0 | 1 | 2 | 4  |
| N73  | Other female pelvic inflammatory diseases                            | 0 | 0 | 0 | 1  |
| N75  | Diseases of Bartholin's gland                                        | 0 | 0 | 0 | 1  |
|      |                                                                      |   |   |   |    |
| G35* | Multiple sclerosis                                                   | 1 | 5 | 6 | 9  |
| A04  | Other bacterial intestinal infections                                | 0 | 0 | 0 | 1  |
| A09  | Infectious gastroenteritis and colitis, unspecified                  | 0 | 0 | 0 | 1  |
| A40  | Streptococcal sepsis                                                 | 0 | 0 | 1 | 2  |
| A41  | Other sepsis                                                         | 0 | 0 | 1 | 2  |
| B34  | Viral infection of unspecified site                                  | 0 | 1 | 0 | 0  |
| B37  | Candidiasis                                                          | 0 | 1 | 0 | 0  |
| B96  | Other bacterial agents as the cause of diseases classified elsewhere | 0 | 0 | 0 | 1  |
| H00  | Hordeolum and chalazion                                              | 0 | 0 | 0 | 1  |
| J01  | Acute sinusitis                                                      | 0 | 0 | 0 | 1  |
| J06  | Acute upper respiratory infections of multiple and unspecified sites | 0 | 0 | 0 | 1  |
| J20  | Acute bronchitis                                                     | 0 | 0 | 1 | 1  |
| N39  | Other disorders of urinary system                                    | 1 | 3 | 3 | 2  |

Notes: \*) Main diagnosis assigned was MS, listed are all infections noted as secondary diagnoses. Patients may have several secondary diagnoses.



**eTable 6: All observed inpatient serious infection diagnoses during the follow-up (including secondary diagnoses and multiple diagnoses per patient)**

|       |                                                             | IFN $\beta$ /GA<br>(n = 2217) | Fingolimod<br>(n = 1535) | Natalizumab<br>(n = 1588) | Rituximab<br>(n = 3260) |
|-------|-------------------------------------------------------------|-------------------------------|--------------------------|---------------------------|-------------------------|
| ICD10 | Description                                                 |                               |                          |                           |                         |
| A04   | Other bacterial intestinal infections                       | 0                             | 4                        | 1                         | 10                      |
| A08   | Viral and other specified intestinal infections             | 0                             | 0                        | 1                         | 2                       |
| A09   | Infectious gastroenteritis and colitis, unspecified         | 4                             | 3                        | 4                         | 8                       |
| A15   | Respiratory tuberculosis                                    | 0                             | 0                        | 0                         | 1                       |
| A26   | Erysipeloid                                                 | 1                             | 0                        | 0                         | 0                       |
| A28   | Other zoonotic bacterial diseases, not elsewhere classified | 1                             | 0                        | 0                         | 0                       |
| A40   | Streptococcal sepsis                                        | 0                             | 0                        | 2                         | 2                       |
| A41   | Other sepsis                                                | 4                             | 4                        | 7                         | 8                       |
| A46   | Erysipelas                                                  | 2                             | 2                        | 3                         | 5                       |
| A48   | Other bacterial diseases, not elsewhere classified          | 0                             | 0                        | 0                         | 1                       |
| A49   | Bacterial infection of unspecified site                     | 0                             | 0                        | 1                         | 2                       |
| A60   | Anogenital herpesviral [herpes simplex] infections          | 0                             | 0                        | 0                         | 1                       |
| A69   | Other spirochetal infections                                | 0                             | 0                        | 0                         | 5                       |
| A78   | Q fever                                                     | 0                             | 0                        | 0                         | 2                       |
| A81   | Atypical virus infections of central nervous system         | 0                             | 1                        | 0                         | 6                       |
| A85   | Other viral encephalitis, not elsewhere classified          | 0                             | 0                        | 0                         | 2                       |
| A87   | Viral meningitis                                            | 0                             | 0                        | 0                         | 2                       |
| A98   | Other viral hemorrhagic fevers, not elsewhere classified    | 0                             | 0                        | 0                         | 1                       |
| B00   | Herpesviral [herpes simplex] infections                     | 1                             | 0                        | 0                         | 2                       |
| B01   | Varicella [chickenpox]                                      | 0                             | 0                        | 3                         | 1                       |
| B02   | Zoster [herpes zoster]                                      | 0                             | 4                        | 0                         | 1                       |
| B17   | Other acute viral hepatitis                                 | 0                             | 0                        | 1                         | 0                       |
| B18   | Chronic viral hepatitis                                     | 2                             | 0                        | 1                         | 0                       |
| B25   | Cytomegaloviral disease                                     | 0                             | 0                        | 0                         | 2                       |
| B34   | Viral infection of unspecified site                         | 2                             | 6                        | 3                         | 5                       |
| B35   | Dermatophytosis                                             | 0                             | 0                        | 0                         | 1                       |
| B37   | Candidiasis                                                 | 0                             | 2                        | 0                         | 1                       |
| B59   | Pneumocystosis                                              | 0                             | 0                        | 0                         | 1                       |
| B95   | Strep as the cause of diseases classified elsewhere         | 2                             | 0                        | 2                         | 8                       |
| B96   | Oth bacterial agents as the cause of diseases classd elswhr | 6                             | 3                        | 3                         | 16                      |
| B97   | Viral agents as the cause of diseases classified elsewhere  | 1                             | 0                        | 0                         | 0                       |
| B99   | Other and unspecified infectious diseases                   | 1                             | 1                        | 1                         | 2                       |
| G02   | Meningitis in oth infec/parastc diseases classd elswhr      | 0                             | 0                        | 2                         | 0                       |

|     |                                                             |    |    |   |    |
|-----|-------------------------------------------------------------|----|----|---|----|
| G05 | Encphlts, myelitis & encephalomyelitis in dis classd elswhr | 0  | 0  | 0 | 2  |
| G06 | Intracranial and intraspinal abscess and granuloma          | 0  | 0  | 3 | 0  |
| H00 | Hordeolum and chalazion                                     | 0  | 0  | 0 | 1  |
| H66 | Suppurative and unspecified otitis media                    | 0  | 0  | 1 | 0  |
| H67 | Otitis media in diseases classified elsewhere               | 0  | 1  | 0 | 0  |
| J00 | Acute nasopharyngitis [common cold]                         | 0  | 0  | 1 | 0  |
| J01 | Acute sinusitis                                             | 1  | 0  | 0 | 7  |
| J02 | Acute pharyngitis                                           | 0  | 1  | 0 | 0  |
| J03 | Acute tonsillitis                                           | 1  | 0  | 1 | 3  |
| J05 | Acute obstructive laryngitis [croup] and epiglottitis       | 0  | 0  | 0 | 1  |
| J06 | Acute upper resp infections of multiple and unsp sites      | 2  | 1  | 1 | 11 |
| J09 | Influenza due to certain identified influenza viruses       | 0  | 1  | 0 | 1  |
| J10 | Influenza due to other identified influenza virus           | 0  | 4  | 2 | 2  |
| J11 | Influenza due to unidentified influenza virus               | 0  | 1  | 0 | 1  |
| J13 | Pneumonia due to Streptococcus pneumoniae                   | 0  | 0  | 0 | 5  |
| J14 | Pneumonia due to Hemophilus influenzae                      | 0  | 0  | 0 | 3  |
| J15 | Bacterial pneumonia, not elsewhere classified               | 7  | 3  | 4 | 10 |
| J17 | Pneumonia in diseases classified elsewhere                  | 0  | 0  | 0 | 1  |
| J18 | Pneumonia, unspecified organism                             | 4  | 6  | 3 | 14 |
| J20 | Acute bronchitis                                            | 0  | 1  | 1 | 2  |
| J32 | Chronic sinusitis                                           | 1  | 0  | 0 | 3  |
| J85 | Abscess of lung and mediastinum                             | 0  | 1  | 0 | 0  |
| J86 | Pyothorax                                                   | 0  | 0  | 0 | 3  |
| K10 | Other diseases of jaws                                      | 0  | 0  | 0 | 1  |
| K57 | Diverticular disease of intestine                           | 0  | 2  | 0 | 1  |
| K61 | Abscess of anal and rectal regions                          | 0  | 2  | 1 | 4  |
| K63 | Other diseases of intestine                                 | 1  | 0  | 0 | 0  |
| K65 | Peritonitis                                                 | 2  | 0  | 2 | 6  |
| L02 | Cutaneous abscess, furuncle and carbuncle                   | 7  | 1  | 4 | 4  |
| L03 | Cellulitis and acute lymphangitis                           | 2  | 1  | 0 | 1  |
| L04 | Acute lymphadenitis                                         | 0  | 0  | 1 | 0  |
| L08 | Other local infections of skin and subcutaneous tissue      | 1  | 0  | 0 | 6  |
| M46 | Other inflammatory spondylopathies                          | 0  | 0  | 2 | 1  |
| M65 | Synovitis and tenosynovitis                                 | 0  | 2  | 0 | 0  |
| M72 | Fibroblastic disorders                                      | 1  | 1  | 0 | 0  |
| N10 | Acute tubulo-interstitial nephritis                         | 7  | 5  | 6 | 19 |
| N30 | Cystitis                                                    | 1  | 3  | 2 | 4  |
| N39 | Other disorders of urinary system                           | 14 | 21 | 8 | 17 |

|     |                                           |   |   |   |   |
|-----|-------------------------------------------|---|---|---|---|
| N70 | Salpingitis and oophoritis                | 1 | 1 | 2 | 5 |
| N73 | Other female pelvic inflammatory diseases | 0 | 0 | 2 | 1 |
| N75 | Diseases of Bartholin's gland             | 0 | 0 | 0 | 1 |

**eTable 7: Sensitivity analysis, 90 days lag time**

| Serious infections                                                                                                                                                                                                                                                                                                           | Events | IR/1000 person-years (95% CI) | HR4 (95% CI)     |
|------------------------------------------------------------------------------------------------------------------------------------------------------------------------------------------------------------------------------------------------------------------------------------------------------------------------------|--------|-------------------------------|------------------|
| IFNβ/GA                                                                                                                                                                                                                                                                                                                      | 33     | 8.1 (5.6-11.4)                | 0.47 (0.31-0.70) |
| Fingolimod                                                                                                                                                                                                                                                                                                                   | 49     | 13.5 (10-17.9)                | 0.68 (0.48-0.97) |
| Natalizumab                                                                                                                                                                                                                                                                                                                  | 37     | 10.6 (7.5-14.7)               | 0.66 (0.44-0.97) |
| Rituximab                                                                                                                                                                                                                                                                                                                    | 109    | 19.7 (16.2-23.8)              | 1.0 (Ref)        |
| General pop.                                                                                                                                                                                                                                                                                                                 | 657    | 5 (4.6-5.4)                   | 0.40 (0.32-0.51) |
| <b>Any antibacterial use</b>                                                                                                                                                                                                                                                                                                 |        |                               |                  |
| IFNβ/GA                                                                                                                                                                                                                                                                                                                      | 482    | 195.1 (178.1-213.3)           | 0.84 (0.74-0.94) |
| Fingolimod                                                                                                                                                                                                                                                                                                                   | 424    | 207 (187.8-227.7)             | 0.88 (0.78-0.99) |
| Natalizumab                                                                                                                                                                                                                                                                                                                  | 460    | 238.6 (217.3-261.4)           | 1.01 (0.89-1.14) |
| Rituximab                                                                                                                                                                                                                                                                                                                    | 785    | 244.2 (227.5-261.9)           | 1.0 (Ref)        |
| General pop.                                                                                                                                                                                                                                                                                                                 | 11837  | 143.7 (141.2-146.4)           | 0.74 (0.68-0.80) |
| <b>Herpes antiviral use</b>                                                                                                                                                                                                                                                                                                  |        |                               |                  |
| IFNβ/GA                                                                                                                                                                                                                                                                                                                      | 62     | 15.6 (12-20)                  | 0.94 (0.68-1.30) |
| Fingolimod                                                                                                                                                                                                                                                                                                                   | 101    | 29 (23.6-35.2)                | 1.62 (1.21-2.16) |
| Natalizumab                                                                                                                                                                                                                                                                                                                  | 108    | 31.9 (26.2-38.5)              | 1.64 (1.23-2.19) |
| Rituximab                                                                                                                                                                                                                                                                                                                    | 110    | 20.3 (16.7-24.5)              | 1.0 (Ref)        |
| General pop.                                                                                                                                                                                                                                                                                                                 | 1158   | 9 (8.4-9.5)                   | 0.57 (0.46-0.71) |
| Abbreviations: IR, incidence rate; HR, hazard ratio. UTI, urinary tract infection<br>HR4: Hazard ratio adjusted for age, sex, education level, country of birth, sick leave, disability pension, hospitalizations previous 5 years, history of infections, cancer, antidepressants and antipsychotics use, MACE, arrhythmia. |        |                               |                  |

The 90 days lag time means that patients with events in the first 90 days were excluded from analysis (and that the first 90 days were excluded from the time-at-risk). The primary intention of this sensitivity analysis was to assess the possible impact of planned prophylactic use of herpes antivirals, which we assumed would be started early in the DMT treatment course.

**eTable 8: Distribution of herpes antiviral use in first 18 months of DMT treatment, among those with any herpes antivirals use and at least 18 months' follow-up**

|                                    | IFNβ/GA           | Fingolimod      | Natalizumab       | Rituximab       |
|------------------------------------|-------------------|-----------------|-------------------|-----------------|
| <b>N obs</b>                       | 27                | 52              | 42                | 79              |
| <b>Total DDDs</b>                  |                   |                 |                   |                 |
| Min-Max                            | 1.25-15.0         | 1.25-50.0       | 1.25-47.0         | 1.25-269.0      |
| Median (IQR)                       | 6.68 (3.75 - 7.0) | 7.0 (7.0 -10.0) | 7.0 (2.5 - 10.02) | 7.0 (5.0 -15.0) |
| Mean (STD)                         | 6.5 (3.6)         | 9.8 (8.6)       | 8.5 (8.9)         | 14.3 (31.3)     |
| <b>Filled prescriptions, No(%)</b> |                   |                 |                   |                 |
| <b>1</b>                           | 17 (63%)          | 31 (60%)        | 28 (67%)          | 43 (54%)        |
| <b>2-3</b>                         | 7 (26%)           | 12 (23%)        | 7 (17%)           | 23 (29%)        |
| <b>4-5</b>                         | 3 (11%)           | 5 (10%)         | 6 (14%)           | 6 (8%)          |
| <b>6+</b>                          | 0 (0%)            | 4 (8%)          | 1 (2%)            | 7 (9%)          |
